# Supplementary material
Source: HighWire-hosted journal article supplement (http://ajnr-stage2.highwire.org/highwire/filestream/182623/field_highwire_adjunct_files/0/18-00406.pdf)
Supplement: 18-00406.pdf [file 18-00406.pdf]

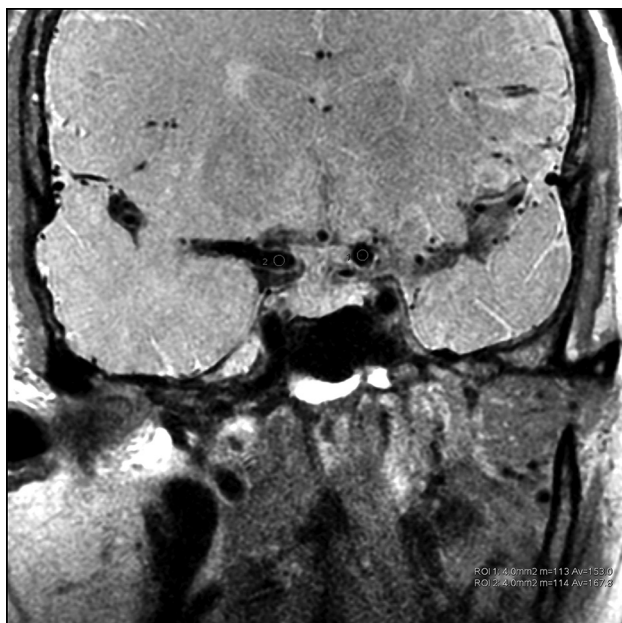

**ON-LINE FIGURE.** Example of ROIs defined on VWMRI. The ROI is placed in the left stented artery adjacent to the aneurysm neck on a single-slice source image. The mean value of the SI is acquired. An additional ROI is placed in the right contralateral normal artery. The relative SI of the stented artery is calculated as follows: SI of the Stented Artery/SI of the Contralateral Normal Artery.
